# Supplementary material for: Multilayered YSZ/GZO films with greatly enhanced ionic conduction for low temperature solid oxidefuel cells
Source: Royal Society of Chemistry journal article supplement (doi:10.1039/c2cp42964k), 2012-11-21
Supplement: c2cp42964k.pdf [file c2cp42964k.pdf]

## Supplementary Information

### **Multilayered YSZ/GZO films with greatly enhanced ionic conduction for low temperature solid oxide fuel cells**

**Bin Li,<sup>ab</sup> Jiaming Zhang,<sup>c</sup> Tiffany Kaspar,<sup>d</sup> Vaithiyalingam Shutthanandan,<sup>d</sup> Rodney C Ewing<sup>c</sup> and Jie Lian<sup>\*a</sup>**

<sup>a</sup> *Department of Mechanical, Aerospace & Nuclear Engineering,*

*Rensselaer Polytechnic Institute, Troy, New York 12180, USA. Fax: +1 518 276 6025; Tel: +1 518 276 6081; E-mail: [lianj@rpi.edu](mailto:lianj@rpi.edu)*

<sup>b</sup> *Physical Sciences Laboratory, Pacific Northwest National Laboratory, Richland, WA 99352*

<sup>c</sup> *Departments of Earth & Environmental Sciences and Materials Sciences & Engineering, University of Michigan, Ann Arbor, MI 48109-1005, U.S.A.*

<sup>d</sup> *Environmental Molecular Sciences Laboratory, Pacific Northwest National Laboratory, Richland, WA 99352*

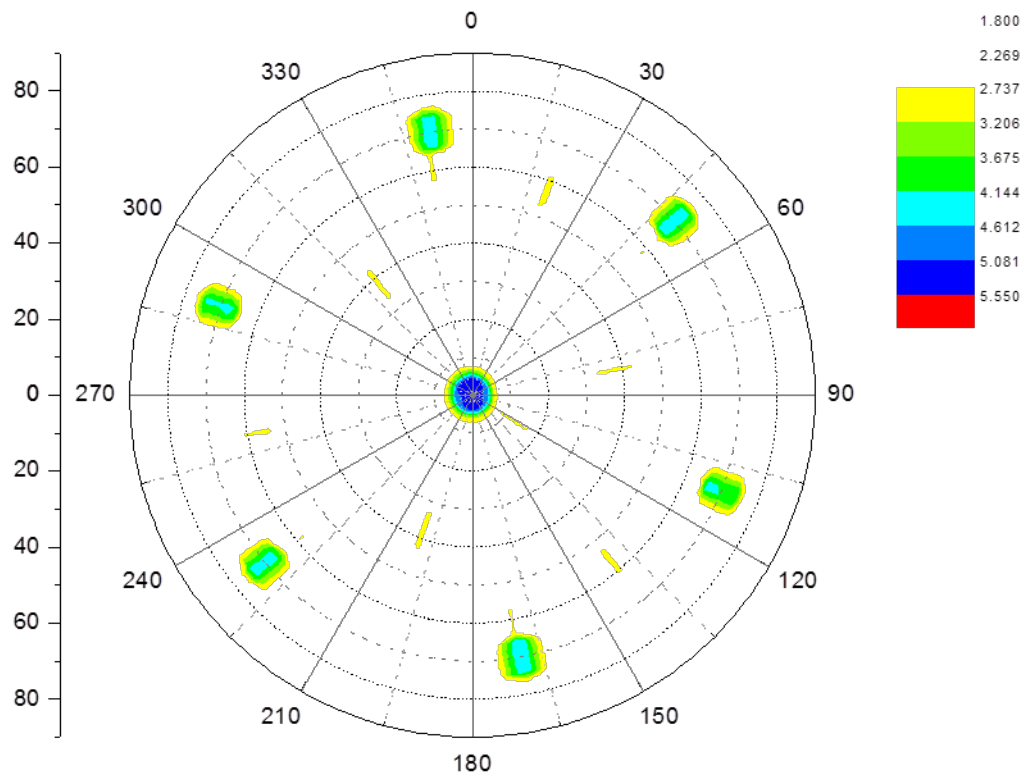

**Fig. S1** Pole figure for single-layer YSZ grown on (0001) Al<sub>2</sub>O<sub>3</sub>

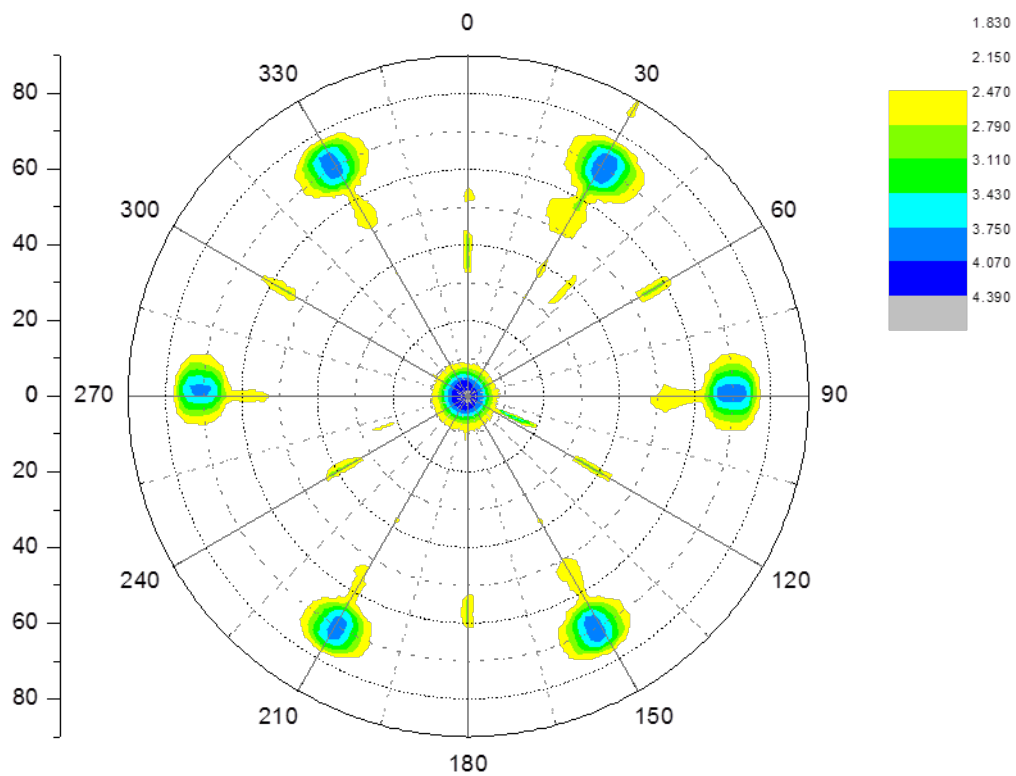

**Fig. S2** Pole figure for  $(\text{GZO/YSZ})_{N/2}/\text{Al}_2\text{O}_3$  heterostructures with  $N=10$
